# Supplementary material for: Trinuclear alkyl hydrido rare-earth complexes supported by amidopyridinato ligands: synthesis, structures, C–Si bond activation and catalytic activity in ethylene polymerization
Source: Royal Society of Chemistry journal article supplement (doi:10.1039/c4dt00806e), 2014-01-01
Supplement: c4dt00806e1.pdf [file c4dt00806e1.pdf]

# Trinuclear Alkyl Hydrido Rare-Earth Complexes Supported by Amidopyridinato Ligands: Synthesis, Structures, C-Si Bond Activation and Catalytic Activity in Ethylene Polymerization

Dmitry M. Lyubov, Anton V. Cherkasov, Georgy K. Fukin, Sergey Yu. Ketkov, Andrey S. Shavyrin, Alexander A. Trifonov\*

## Electron Supporting Information

**Fig. SI1.**  $^1\text{H}$  NMR spectrum of **1Lu** (400 MHz,  $\text{C}_6\text{D}_6$ , 293 K).

**Fig. SI2.**  $^{13}\text{C}\{^1\text{H}\}$  NMR spectrum of **1Lu** (400 MHz,  $\text{C}_6\text{D}_6$ , 293 K).

**Fig. SI3.**  $^1\text{H}$  NMR spectrum of **2Lu** (400 MHz,  $\text{C}_6\text{D}_6$ , 293 K).

**Fig. SI4.**  $^{13}\text{C}\{^1\text{H}\}$  NMR spectrum of **2Lu** (400 MHz,  $\text{C}_6\text{D}_6$ , 293 K).

**Fig. SI5.** 2D NOESY spectrum of **2Lu** (400 MHz,  $\text{C}_7\text{D}_8$ , 293 K).

**Fig. SI6.** Variable-temperature  $^1\text{H}$  NMR spectra of **2Lu** (400 MHz,  $\text{C}_7\text{D}_8$ ).

**Fig. SI7.** 2D  $^{89}\text{Y}\text{-}^1\text{H}$  HMQC NMR spectrum of **3Y** showing  $^{89}\text{Y}\text{-}^1\text{H}$  spin-spin interactions (400 MHz,  $\text{C}_6\text{D}_6$ , 293 K).

**Fig. SI8.** Fragment of 2D  $^{89}\text{Y}\text{-}^1\text{H}$  (GE) HMQC long range interactions spectrum of **3Y** (400 MHz,  $\text{C}_6\text{D}_6$ , 293 K).

**Fig. SI9.** Contour map of the **3Y** HOMO-4 orbital (0.002-0.01 a.u., step 0.002 a.u.) in the H(2)H(4)H(5) plane. The red and green lines correspond to the positive and negative values of the wavefunction, respectively.

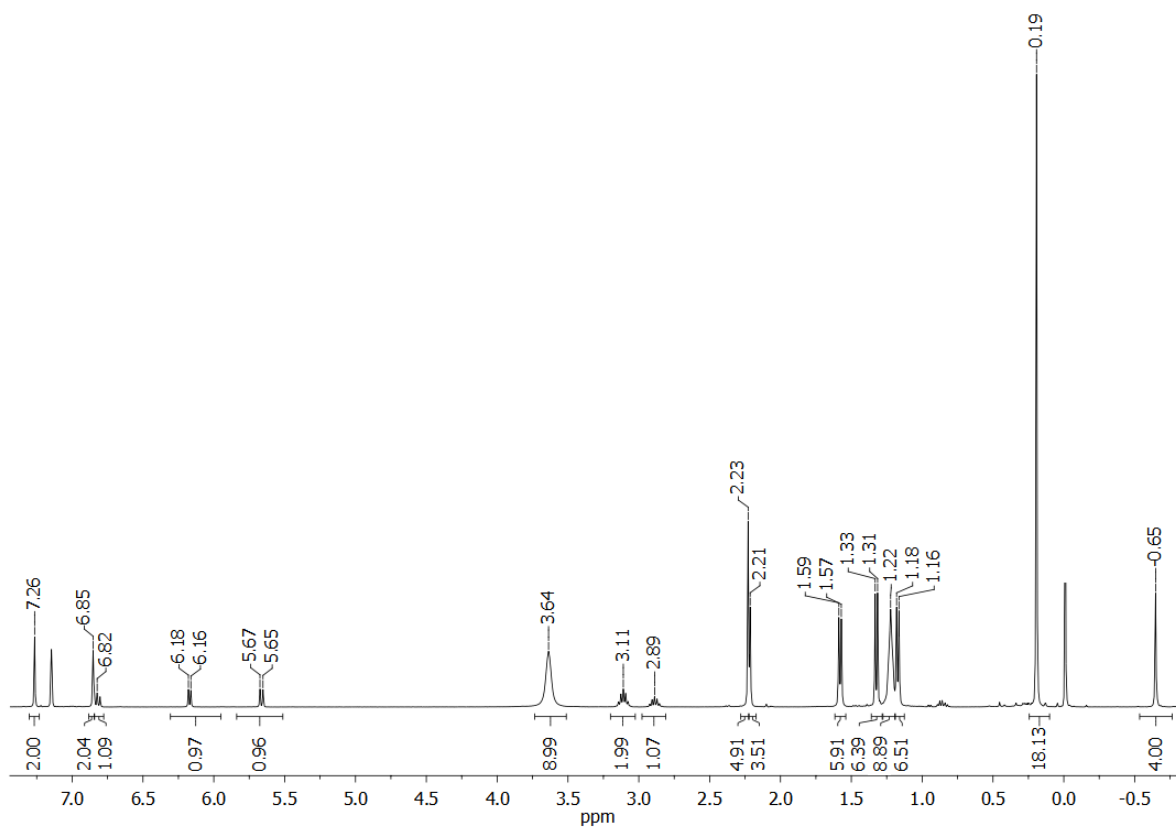

**Fig. S11.**  $^1\text{H}$  NMR spectrum of **1Lu** (400 MHz,  $\text{C}_6\text{D}_6$ , 293 K).

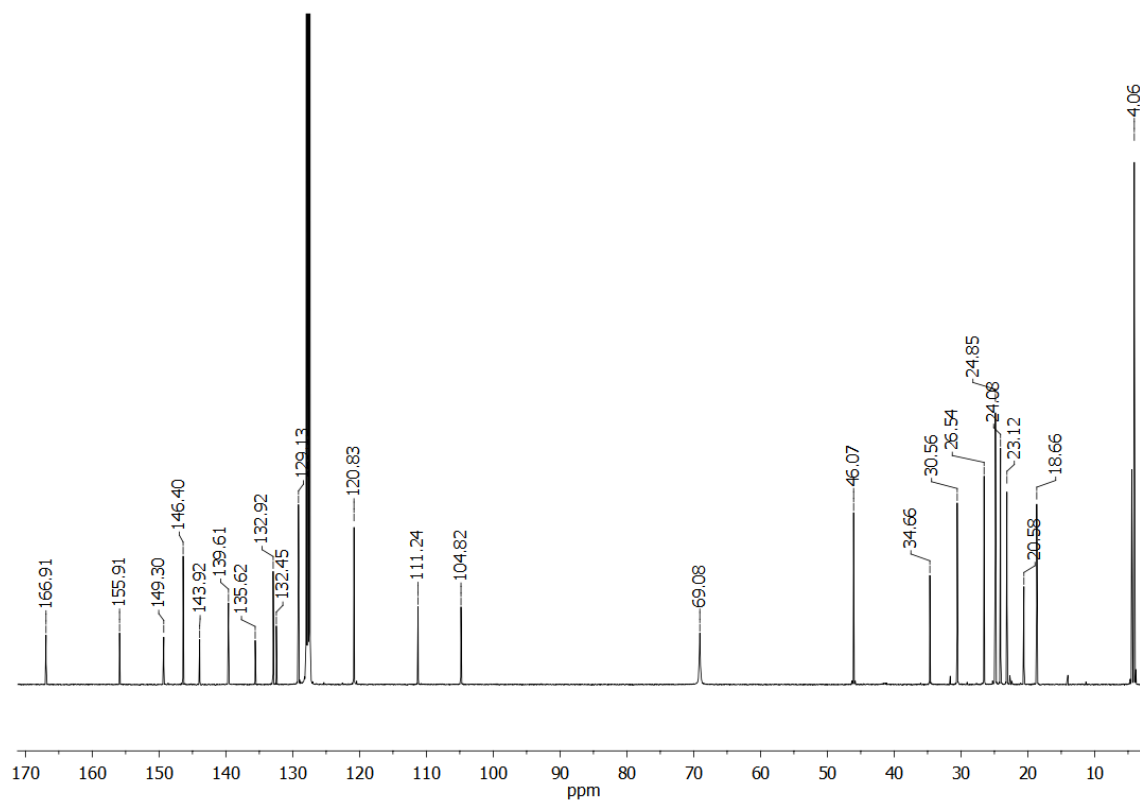

**Fig. S12.**  $^{13}\text{C}\{^1\text{H}\}$  NMR spectrum of **1Lu** (400 MHz,  $\text{C}_6\text{D}_6$ , 293 K).

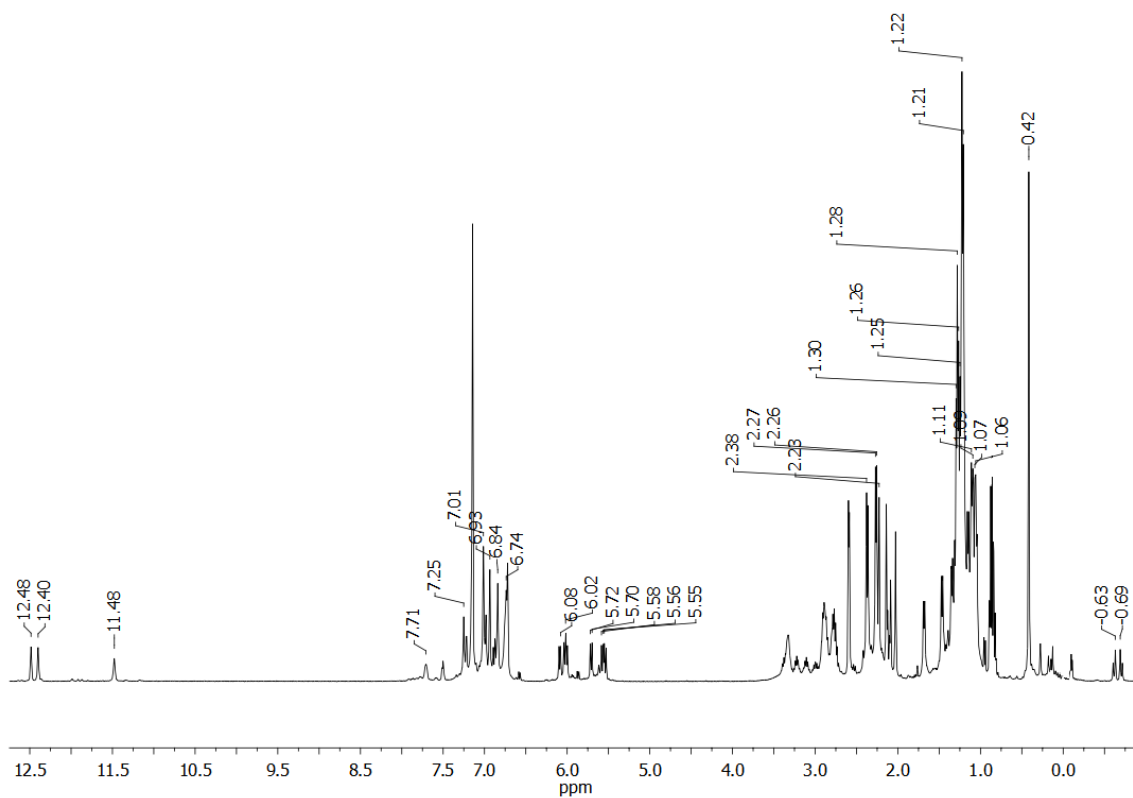

**Fig. SI3.**  $^1\text{H}$  NMR spectrum of **2Lu** (400 MHz,  $\text{C}_6\text{D}_6$ , 293 K).

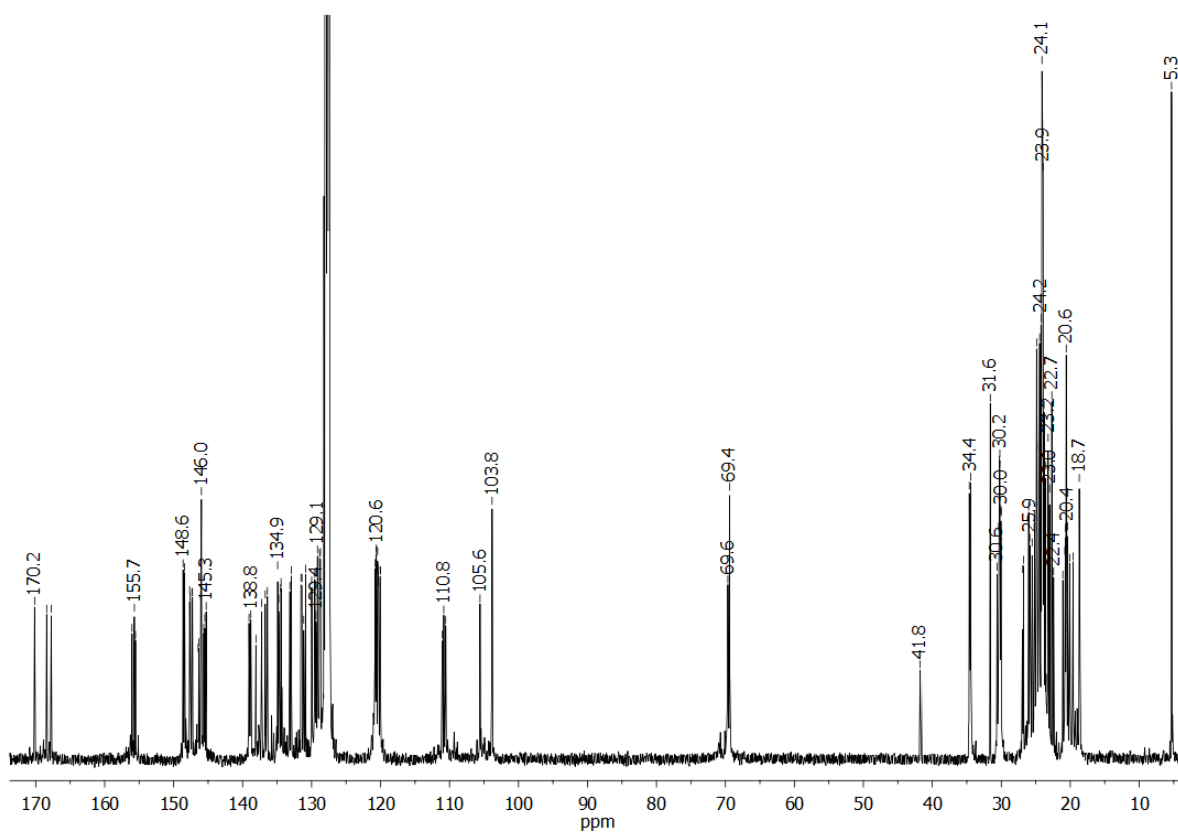

**Fig. SI4.**  $^{13}\text{C}\{^1\text{H}\}$  NMR spectrum of **2Lu** (400 MHz,  $\text{C}_6\text{D}_6$ , 293 K).

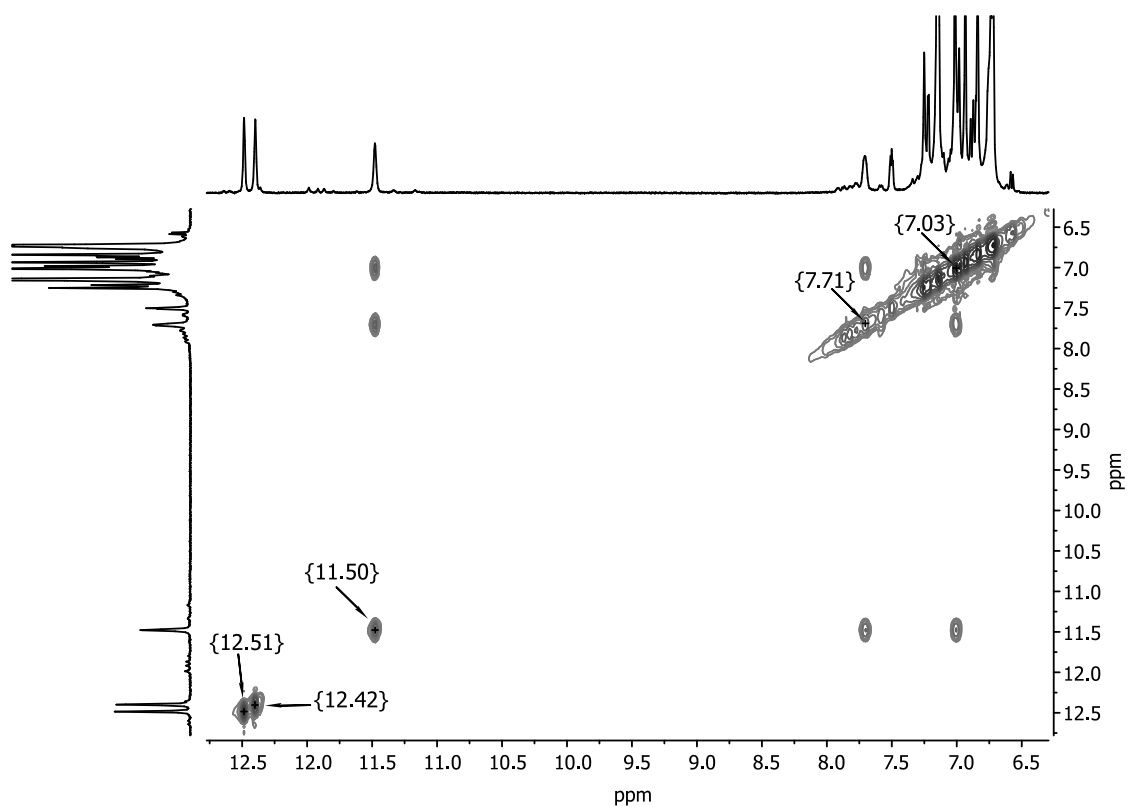

**Fig. SI5.** 2D NOESY spectrum of **2Lu** (400 MHz, C<sub>7</sub>D<sub>8</sub>, 293 K).

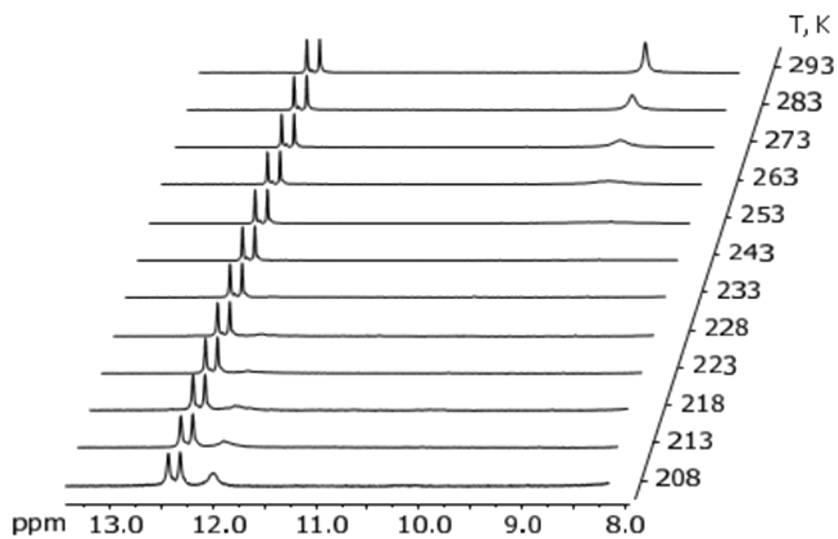

**Fig. SI6.** Variable-temperature <sup>1</sup>H NMR spectra of **2Lu** (400 MHz, C<sub>7</sub>D<sub>8</sub>).

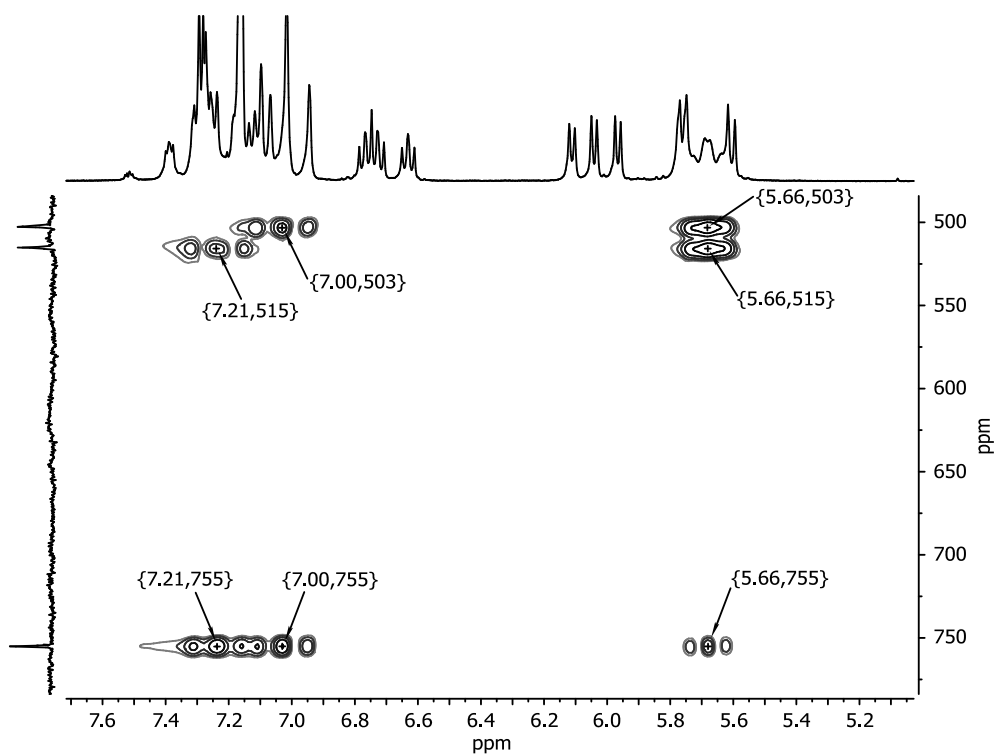

**Fig. SI7.** 2D  $^{89}\text{Y}$ - $^1\text{H}$  HMQC NMR spectrum of **3Y** showing  $^{89}\text{Y}$ - $^1\text{H}$  spin-spin interactions (optimized for  $^1J_{\text{YH}} = 20\text{Hz}$ , no  $^{89}\text{Y}$  decoupling during acquisition) (400 MHz,  $\text{C}_6\text{D}_6$ , 293 K).

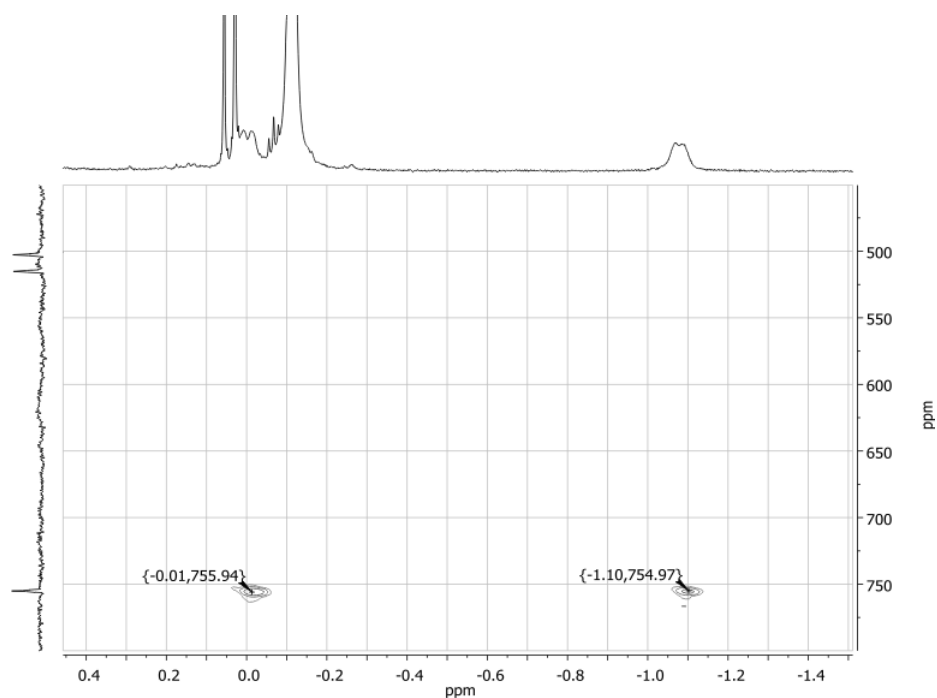

**Fig. SI8.** Fragment of 2D  $^{89}\text{Y}$ - $^1\text{H}$  (GE) HMQC long range interactions spectrum of **3Y** (400 MHz,  $\text{C}_6\text{D}_6$ , 293 K).

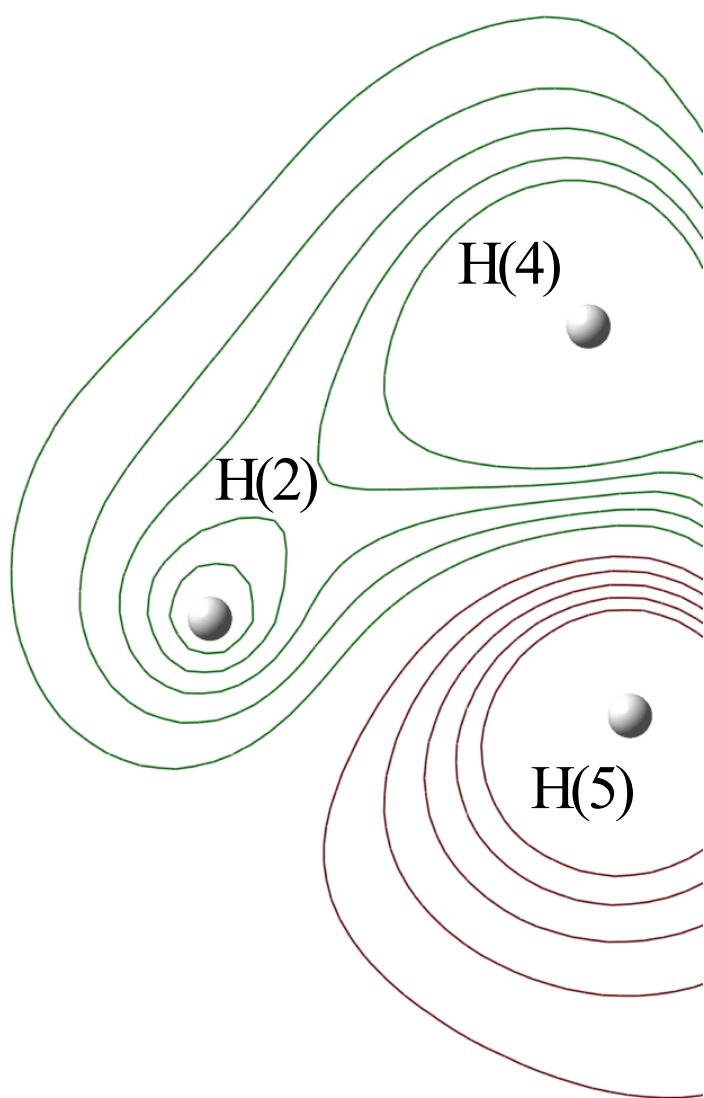

**Fig. S19.** Contour map of the **3Y** HOMO-4 orbital (0.002-0.01 a.u., step 0.002 a.u.) in the H(2)H(4)H(5) plane. The red and green lines correspond to the positive and negative values of the wavefunction, respectively.
